# Supplementary material
Source: PubMed Central journal article supplement (PMC3855825)
Supplement: NIHMS376168-supplement-01.pdf [file NIHMS376168-supplement-01.pdf]

**Table S1. Oligonucleotides used in this study**

| PRIMER                                                                                                      | SEQUENCE                                                                                                      | COMMENTS                                              |                                                |
|-------------------------------------------------------------------------------------------------------------|---------------------------------------------------------------------------------------------------------------|-------------------------------------------------------|------------------------------------------------|
| <b>Primers used in construction of knockout vectors</b>                                                     |                                                                                                               |                                                       |                                                |
|                                                                                                             |                                                                                                               | Primer use, construct Deleted locus or insertion site |                                                |
| PMiniHXF                                                                                                    | 5' -GATAAGCTTGATCAGCACGAAACCTTG-3'                                                                            | HXGPRT cassette forward primer                        |                                                |
| PMiniHXR                                                                                                    | 5' -CCGCTCTAGAAGTAGTGGATCCC-3'                                                                                | HXGPRT cassette reverse primer                        |                                                |
| DHODF1                                                                                                      | 5' -TTGGGTAAACGCCAGGGTTTCCCAGTACGACGGT<br>TTAAACCACCAAGAGTCACCTCCACGTC-3'                                     | RH DHODH KO 5' forward primer, pΔDHOD, pΔDHODCD       | TGGT1_124080, chrIV Δ bp2056674 to bp2046431   |
| DHODR1                                                                                                      | 5' -GCGGGTTTGAATGCAAGTTTCGTGCTGATCAAAC<br>TAGTGACCGACAGCTGGTCAAGAGTG-3'                                       | RH DHODH KO 5' reverse primer                         |                                                |
| DHODF2                                                                                                      | 5' -TTCTGGCAGGCTACAGTGACACCGCGGTGGAGGAC<br>TAGTGCCGCTGTTGGACGAAAGCAC-3'                                       | RH DHODH KO 5' reverse primer                         |                                                |
| DHODR2                                                                                                      | 5' -GTGAGCGGATAACAATTTACACAGGAAACAGCGC<br>GGCCGCGACGGTGGAAAGACATACGGCATG-3'                                   | RH DHODH KO 5' reverse primer                         |                                                |
| DHODHAF1                                                                                                    | 5' -TTGGGTAAACGCCAGGGTTTCCCAGTACGACGGT<br><br>TTAAACTGGCTTGGGTGAGGTCGGTG-3'                                   | RH DHODH HA TAG 5' forward primer, pDHOD/HA           | TGGT1_124080, chrIV bp2046368 (insertion site) |
| DHODHAR1                                                                                                    | 5' -GCGGGTTTGAATGCAAGTTTCGTGCTGATCAAAC<br>TAGTCTCAAAGAGCGTAATCTGGAACATCGTATGGGTA<br>GTCGAATTTCCGAGCCTGCAGC-3' | RH DHODH HA TAG 5' reverse primer                     |                                                |
| DHODHAF2                                                                                                    | 5' -TTCTGGCAGGCTACAGTGACACCGCGGTGGAGGAC<br>TAGTACAACATGTCTGGGGTCCGGTTCG-3'                                    | RH DHODH HA TAG 3' forward primer                     |                                                |
| DHODHAR2                                                                                                    | 5' -GTGAGCGGATAACAATTTACACAGGAAACAGCGC<br>GGCCGCGACGGTGGAAAGACATACGGCATG-3'                                   | RH DHODH HA TAG 3' reverse primer                     |                                                |
| <b>Primers used for genotype validation</b>                                                                 |                                                                                                               |                                                       |                                                |
| DHODHACXF                                                                                                   | 5' -GAACTCCATTCCGCTCGAATGGC-3'                                                                                |                                                       |                                                |
| DHODCXR                                                                                                     | 5' -GCACGAATCGCCATGTCCGC-3'                                                                                   |                                                       |                                                |
| 5'DHFRCXF                                                                                                   | 5' -GTTGGCCTACGTGACTTCTGATG-3'                                                                                |                                                       |                                                |
| 3'DHFRCXR                                                                                                   | 5' -ACTGCGAACAGCAGCAAGATCG-3'                                                                                 |                                                       |                                                |
| <b>Primers used for construction of tagged TgDHODs for immunolocalization</b>                               |                                                                                                               |                                                       |                                                |
| DHOD.LIC.9385.F                                                                                             | 5' -TACTTCCAATCCAATTTAGCCGCGAGTCGGTCTGAG<br>TTGCGCGGAAG-3'                                                    | forward primer introducing LIC sequences              |                                                |
| DHOD.LIC.YFP.R                                                                                              | 5' -TCCTCCACTTCCAATTTTAGCGTTCGAATTTCCGGAGC<br>CTGCAGCTTTTTC-3'                                                | reverse primer introducing LIC sequences              |                                                |
| DHOD.Mfel.QC.F                                                                                              | 5' -GAAGCCATTCGAATCAATTGAGCCAAGACTGCAG-3'                                                                     | forward primer introducing Mfel site                  |                                                |
| DHOD.Mfel.QC.R                                                                                              | 5' -CTGCAGTCTTGGCTCAATTGATTCGGAATGGCTTC-3'                                                                    | reverse primer introducing Mfel site                  |                                                |
| TgDHOD.BgIII.F                                                                                              | 5' -AGATCTATGGCACCTCTTACCATGCATTTCCAAGGG<br>CGTTTCG-3'                                                        | forward primer for exogenous expression of DHOD       |                                                |
| TgDHOD.myc.Ascl.R                                                                                           | 5' -GGCGCGCCTCATAGGTCTTCTTCTGAGATAAGCTTC<br>TGCTCGTTCGAATTTCCGGAGCCTGCAG-3'                                   | reverse primer for exogenous expression of DHOD       |                                                |
| <b>Primers used for construction of TgDHOD plasmid for recombinant protein expression in <i>E. coli</i></b> |                                                                                                               |                                                       |                                                |
| VSSMs                                                                                                       | 5' -GTAAACCATATGGTGAGCAGTATGATCTACTCCTTC-3'                                                                   | forward primer TgDHOD-VSSM                            |                                                |
| MIYSs                                                                                                       | 5' -GTAAACCATATGATCTACTCCTTCTACGAGCCG-3'                                                                      | forward primer TgDHOD-MIYS                            |                                                |
| FYEPs                                                                                                       | 5' -GTAAACCATATGTTCTACGAGCCGGTAAACATCCGTC-3'                                                                  | forward primer TgDHOD-FYEP                            |                                                |
| TgDHODas                                                                                                    | 5' -AGGCCTCATATGTCAGTTCGAATTTCCGGAGCCTGCAG-3'                                                                 | reverse primer for all expression constructs          |                                                |
